# Supplementary material for: Four-Component Relativistic Calculations of NMR Shielding Constants of the Transition Metal Complexes—Part 2: Nitrogen-Coordinated Complexes of Cobalt
Source: MDPI journal article supplement (doi:10.3390/ijms232113178), 2022-10-29
Supplement: s1 [file s1]

## SUPPORTING INFORMATION

Four-component relativistic calculations of NMR  
shielding constants of the transition metal complexes.  
Part 2: Nitrogen-coordinated complexes of cobalt

**Dmitry O. Samultsev, Valentin A. Semenov, Irina L. Rusakova, and Leonid B. Krivdin \***

*A. E. Favorsky Irkutsk Institute of Chemistry, Siberian Branch of the Russian  
Academy of Sciences, Favorsky St. 1, 664033 Irkutsk, Russia*

**Correspondence:** *krivdin\_office@irioch.irk.ru*

# TABLE OF CONTENTS

|                                                                                                                    |     |
|--------------------------------------------------------------------------------------------------------------------|-----|
| Cartesian coordinates (Angstroms) of 1-27, optimized at the PBE0/ATZP level in the IEF-PCM media (chloroform)..... | S3  |
| [Co(NH <sub>3</sub> ) <sub>5</sub> F] <sup>2+</sup> .....                                                          | S3  |
| [Co(NH <sub>3</sub> ) <sub>5</sub> Cl] <sup>2+</sup> .....                                                         | S4  |
| [Co(NH <sub>3</sub> ) <sub>5</sub> Br] <sup>2+</sup> .....                                                         | S5  |
| [Co(NH <sub>3</sub> ) <sub>5</sub> I] <sup>2+</sup> .....                                                          | S6  |
| [Co(NH <sub>3</sub> ) <sub>5</sub> CH <sub>3</sub> ] <sup>2+</sup> .....                                           | S7  |
| [Co(NH <sub>3</sub> ) <sub>5</sub> CN] <sup>2+</sup> .....                                                         | S8  |
| [Co(NH <sub>3</sub> ) <sub>5</sub> NO <sub>2</sub> ] <sup>2+</sup> .....                                           | S9  |
| [Co(NH <sub>3</sub> ) <sub>5</sub> OH] <sup>2+</sup> .....                                                         | S10 |
| [Co(NH <sub>3</sub> ) <sub>5</sub> N <sub>3</sub> ] <sup>2+</sup> .....                                            | S11 |
| [Co(NH <sub>3</sub> ) <sub>5</sub> CO <sub>3</sub> ] <sup>+</sup> .....                                            | S12 |
| [Co(NH <sub>3</sub> ) <sub>5</sub> H <sub>2</sub> O] <sup>3+</sup> .....                                           | S13 |
| cis-[Co(NH <sub>3</sub> ) <sub>4</sub> (NO <sub>2</sub> ) <sub>2</sub> ] <sup>+</sup> .....                        | S14 |
| cis-[Co(NH <sub>3</sub> ) <sub>4</sub> CO <sub>3</sub> ] <sup>+</sup> .....                                        | S15 |
| cis-[Co(NH <sub>3</sub> ) <sub>4</sub> (H <sub>2</sub> O)Cl] <sup>2+</sup> .....                                   | S16 |
| cis-[Co(NH <sub>3</sub> ) <sub>4</sub> (H <sub>2</sub> O) <sub>2</sub> ] <sup>3+</sup> .....                       | S17 |
| mer-[Co(NH <sub>3</sub> ) <sub>3</sub> (NO <sub>2</sub> ) <sub>3</sub> ] <sup>+</sup> .....                        | S18 |
| fac-[Co(NH <sub>3</sub> ) <sub>3</sub> (NO <sub>2</sub> ) <sub>3</sub> ] <sup>+</sup> .....                        | S19 |
| mer-[Co(NH <sub>3</sub> ) <sub>3</sub> (H <sub>2</sub> O) <sub>3</sub> ] <sup>3+</sup> .....                       | S20 |
| fac-[Co(NH <sub>3</sub> ) <sub>3</sub> (H <sub>2</sub> O) <sub>3</sub> ] <sup>3+</sup> .....                       | S21 |
| cis-[Co(NH <sub>3</sub> ) <sub>2</sub> (NO <sub>2</sub> ) <sub>4</sub> ] <sup>-</sup> .....                        | S22 |
| cis-[Co(NH <sub>3</sub> ) <sub>2</sub> (CO <sub>3</sub> ) <sub>2</sub> ] <sup>-</sup> .....                        | S23 |
| cis,mer-[Co(NH <sub>3</sub> ) <sub>2</sub> (NO <sub>2</sub> ) <sub>3</sub> CH <sub>3</sub> ] <sup>-</sup> .....    | S24 |
| cis,fac-[Co(NO <sub>2</sub> ) <sub>3</sub> (NH <sub>3</sub> ) <sub>2</sub> CH <sub>3</sub> ] <sup>-</sup> .....    | S25 |
| trans,mer-[Co(NH <sub>3</sub> ) <sub>2</sub> (NO <sub>2</sub> ) <sub>3</sub> CH <sub>3</sub> ] <sup>-</sup> .....  | S26 |
| [Co(NH <sub>3</sub> ) <sub>6</sub> ] <sup>3+</sup> .....                                                           | S27 |
| trans-[Co(NH <sub>3</sub> ) <sub>4</sub> (NO <sub>2</sub> ) <sub>2</sub> ] <sup>+</sup> .....                      | S28 |
| trans-[Co(NH <sub>3</sub> ) <sub>2</sub> (NO <sub>2</sub> ) <sub>4</sub> ] <sup>-</sup> .....                      | S29 |

**Cartesian coordinates (Angstroms) of 1-27, optimized at the PBE0/ATZP level in the IEF-PCM media (chloroform).**

Complex 1:

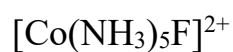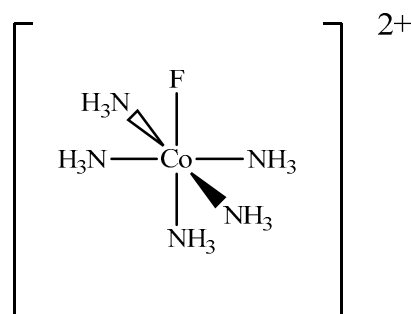

Imaginary frequencies: none

$E^0$ : -1764.5111301 a.u.

|    |              |              |              |
|----|--------------|--------------|--------------|
| Co | 0.117326000  | 0.079822000  | 0.000000000  |
| N  | 0.001276000  | -0.025062000 | 1.973850000  |
| N  | -1.255707000 | 1.505083000  | 0.000000000  |
| N  | 0.001276000  | -0.025062000 | -1.973850000 |
| N  | 1.651326000  | 1.360652000  | 0.000000000  |
| N  | 1.249937000  | -1.545470000 | 0.000000000  |
| H  | -0.750248000 | -0.705534000 | -2.108558000 |
| H  | -0.750248000 | -0.705534000 | 2.108558000  |
| H  | 1.847468000  | -1.705387000 | 0.808938000  |
| H  | 0.551004000  | -2.292128000 | 0.000000000  |
| H  | -1.294175000 | 2.123578000  | -0.807882000 |
| H  | -2.125239000 | 0.966603000  | 0.000000000  |
| H  | -1.294175000 | 2.123578000  | 0.807882000  |
| H  | 1.663388000  | 1.980056000  | -0.808987000 |
| H  | 1.663388000  | 1.980056000  | 0.808987000  |
| H  | 2.563734000  | 0.906966000  | 0.000000000  |
| H  | 1.847468000  | -1.705387000 | -0.808938000 |
| H  | -0.278841000 | 0.815802000  | 2.475173000  |
| H  | 0.813605000  | -0.376361000 | -2.477387000 |
| H  | -0.278841000 | 0.815802000  | -2.475173000 |
| H  | 0.813605000  | -0.376361000 | 2.477387000  |
| F  | -1.267205000 | -1.063176000 | 0.000000000  |

Complex 2:

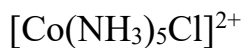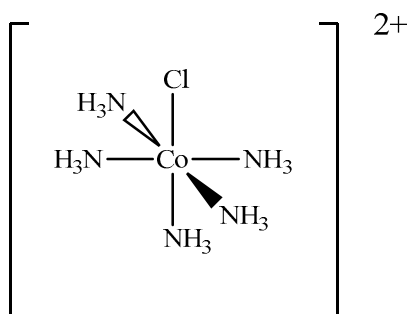

Imaginary frequencies: none

$E^0$ : -2124.7976599 a.u.

|    |              |              |              |
|----|--------------|--------------|--------------|
| Co | 0.067527000  | 0.053224000  | 0.000000000  |
| N  | 0.015408000  | -0.025164000 | 1.986387000  |
| N  | -1.219656000 | 1.569132000  | 0.000000000  |
| N  | 0.015408000  | -0.025164000 | -1.986387000 |
| N  | 1.640361000  | 1.324181000  | 0.000000000  |
| N  | 1.233289000  | -1.558961000 | 0.000000000  |
| H  | -0.546241000 | -0.847949000 | -2.213978000 |
| H  | -0.546241000 | -0.847949000 | 2.213978000  |
| H  | 1.838401000  | -1.681222000 | 0.810265000  |
| H  | 0.592155000  | -2.355336000 | 0.000000000  |
| H  | -1.191436000 | 2.189295000  | -0.807409000 |
| H  | -2.146591000 | 1.137746000  | 0.000000000  |
| H  | -1.191436000 | 2.189295000  | 0.807409000  |
| H  | 1.658626000  | 1.944298000  | -0.808392000 |
| H  | 1.658626000  | 1.944298000  | 0.808392000  |
| H  | 2.548654000  | 0.862220000  | 0.000000000  |
| H  | 1.838401000  | -1.681222000 | -0.810265000 |
| H  | -0.459391000 | 0.750475000  | 2.444883000  |
| H  | 0.905192000  | -0.123587000 | -2.472809000 |
| H  | -0.459391000 | 0.750475000  | -2.444883000 |
| H  | 0.905192000  | -0.123587000 | 2.472809000  |
| Cl | -1.667169000 | -1.311352000 | 0.000000000  |

Complex **3**:

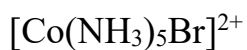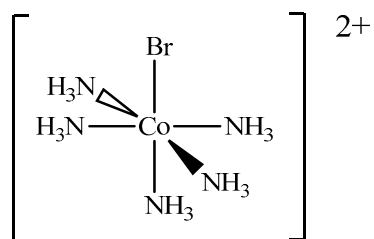

Imaginary frequencies: none

$E^0$ : -4238.5740285 a.u.

|    |              |              |              |
|----|--------------|--------------|--------------|
| Co | 0.057879000  | 0.052031000  | 0.000000000  |
| N  | 0.005546000  | -0.031036000 | 1.987265000  |
| N  | -1.181295000 | 1.609909000  | 0.000000000  |
| N  | 0.005546000  | -0.031036000 | -1.987265000 |
| N  | 1.662771000  | 1.306776000  | 0.000000000  |
| N  | 1.214904000  | -1.567839000 | 0.000000000  |
| H  | -0.358223000 | -0.950286000 | -2.241844000 |
| H  | -0.358223000 | -0.950286000 | 2.241844000  |
| H  | 1.821370000  | -1.681154000 | 0.810715000  |
| H  | 0.587212000  | -2.374712000 | 0.000000000  |
| H  | -1.120720000 | 2.227833000  | -0.807536000 |
| H  | -2.130081000 | 1.229383000  | 0.000000000  |
| H  | -1.120720000 | 2.227833000  | 0.807536000  |
| H  | 1.689960000  | 1.927889000  | -0.807423000 |
| H  | 1.689960000  | 1.927889000  | 0.807423000  |
| H  | 2.565287000  | 0.833572000  | 0.000000000  |
| H  | 1.821370000  | -1.681154000 | -0.810715000 |
| H  | -0.652640000 | 0.619153000  | 2.413392000  |
| H  | 0.884530000  | 0.094429000  | -2.487821000 |
| H  | -0.652640000 | 0.619153000  | -2.413392000 |
| H  | 0.884530000  | 0.094429000  | 2.487821000  |
| Br | -1.826664000 | -1.369596000 | 0.000000000  |

# Complex 4:

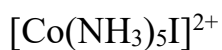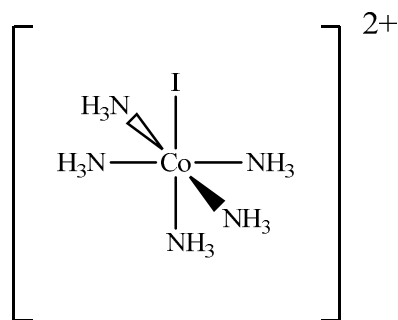

Imaginary frequencies: none

$E^0$ : -8579.2928706 a.u.

|    |              |              |              |
|----|--------------|--------------|--------------|
| Co | 0.161215000  | 0.113751000  | -0.000074000 |
| N  | 0.054220000  | 0.011358000  | 1.968425000  |
| N  | -1.202081000 | 1.531957000  | -0.000786000 |
| N  | 0.055992000  | 0.010660000  | -1.968681000 |
| N  | 1.720168000  | 1.420779000  | 0.000032000  |
| N  | 1.278297000  | -1.508886000 | 0.000871000  |
| H  | -0.704002000 | -0.672181000 | -2.061080000 |
| H  | -0.706550000 | -0.670834000 | 2.060233000  |
| H  | 1.041063000  | -2.098737000 | -0.794918000 |
| H  | 2.293086000  | -1.405159000 | 0.000922000  |
| H  | -1.827110000 | 1.417776000  | 0.795118000  |
| H  | -0.889187000 | 2.502834000  | -0.000161000 |
| H  | -1.825676000 | 1.418554000  | -0.797920000 |
| H  | 1.724707000  | 2.043845000  | -0.806104000 |
| H  | 1.732857000  | 2.033614000  | 0.813879000  |
| H  | 2.637673000  | 0.978728000  | -0.007500000 |
| H  | 1.041169000  | -2.097967000 | 0.797253000  |
| H  | -0.222645000 | 0.853243000  | 2.466504000  |
| H  | 0.871992000  | -0.347094000 | -2.457831000 |
| H  | -0.221415000 | 0.852017000  | -2.467348000 |
| H  | 0.869480000  | -0.347177000 | 2.458214000  |
| I  | -1.686993000 | -1.404635000 | -0.000637000 |

Complex **5**:

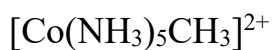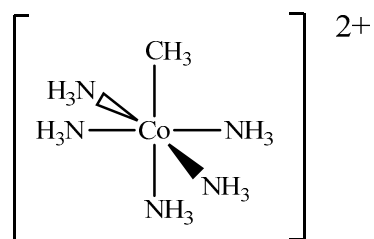

Imaginary frequencies: none

$E^0$ : -1704.5615671 a.u.

|    |              |              |              |
|----|--------------|--------------|--------------|
| Co | -1.239297000 | 0.757451000  | 0.000000000  |
| N  | -1.212751000 | 0.679934000  | 1.993917000  |
| N  | -3.215826000 | 1.035663000  | 0.000000000  |
| C  | -1.581643000 | -1.165139000 | 0.000000000  |
| N  | -1.212751000 | 0.679934000  | -1.993917000 |
| N  | -0.957896000 | 2.903353000  | 0.000000000  |
| H  | -0.671350000 | -0.122381000 | -2.311774000 |
| H  | -0.671350000 | -0.122381000 | 2.311774000  |
| H  | 1.223106000  | 0.866695000  | 0.806916000  |
| H  | 0.974844000  | -0.516550000 | 0.000000000  |
| H  | -3.572752000 | 1.547301000  | -0.805148000 |
| H  | -3.710043000 | 0.144302000  | 0.000000000  |
| H  | -3.572752000 | 1.547301000  | 0.805148000  |
| H  | -1.372273000 | 3.373787000  | -0.802930000 |
| H  | -1.372273000 | 3.373787000  | 0.802930000  |
| H  | 0.012757000  | 3.212386000  | 0.000000000  |
| H  | -2.159981000 | -1.448746000 | -0.883586000 |
| H  | -2.159981000 | -1.448746000 | 0.883586000  |
| H  | 1.223106000  | 0.866695000  | -0.806916000 |
| H  | -2.131242000 | 0.538271000  | 2.410105000  |
| H  | -0.820028000 | 1.489847000  | -2.471324000 |
| H  | -2.131242000 | 0.538271000  | -2.410105000 |
| H  | -0.820028000 | 1.489847000  | 2.471324000  |
| N  | 0.740375000  | 0.474796000  | 0.000000000  |
| H  | -0.662229000 | -1.756345000 | 0.000000000  |

Complex **6**:

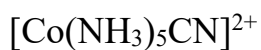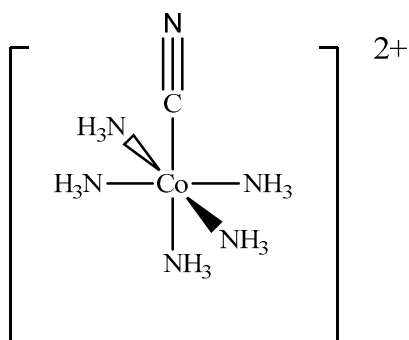

Imaginary frequencies: none

$E^0$ : -1757.4454222 a.u.

|    |              |              |              |
|----|--------------|--------------|--------------|
| Co | 0.039238000  | 0.042261000  | 0.000000000  |
| N  | -0.036431000 | -0.049830000 | 1.989357000  |
| N  | -1.190279000 | 1.611774000  | 0.000000000  |
| C  | -1.454394000 | -1.065173000 | 0.000000000  |
| N  | -0.036431000 | -0.049830000 | -1.989357000 |
| N  | 1.679804000  | 1.292313000  | 0.000000000  |
| H  | -0.283775000 | -0.998092000 | -2.273491000 |
| H  | -0.283775000 | -0.998092000 | 2.273491000  |
| H  | 1.786825000  | -1.697953000 | 0.810176000  |
| H  | 0.574726000  | -2.420787000 | 0.000000000  |
| H  | -1.106150000 | 2.227648000  | -0.807406000 |
| H  | -2.156268000 | 1.279723000  | 0.000000000  |
| H  | -1.106150000 | 2.227648000  | 0.807406000  |
| H  | 1.720801000  | 1.916052000  | -0.805155000 |
| H  | 1.720801000  | 1.916052000  | 0.805155000  |
| H  | 2.578955000  | 0.812235000  | 0.000000000  |
| H  | 1.786825000  | -1.697953000 | -0.810176000 |
| H  | -0.777917000 | 0.522143000  | 2.391126000  |
| H  | 0.812387000  | 0.194687000  | -2.498051000 |
| H  | -0.777917000 | 0.522143000  | -2.391126000 |
| H  | 0.812387000  | 0.194687000  | 2.498051000  |
| N  | 1.177163000  | -1.595872000 | 0.000000000  |
| N  | -2.369982000 | -1.769330000 | 0.000000000  |



Complex 7:

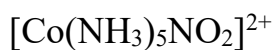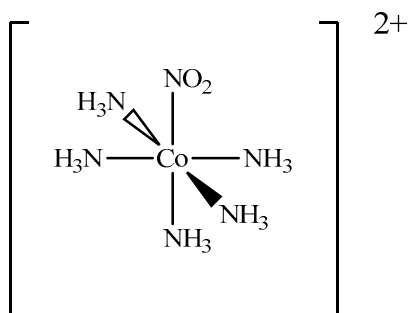

Imaginary frequencies: none

$E^0$ : -1869.6878239 a.u.

|    |              |              |              |
|----|--------------|--------------|--------------|
| Co | 0.025519000  | 0.027628000  | 0.000000000  |
| N  | 0.002823000  | 0.002188000  | 1.985008000  |
| N  | -1.295386000 | 1.526212000  | 0.000000000  |
| N  | -1.491655000 | -1.198007000 | 0.000000000  |
| N  | 0.002823000  | 0.002188000  | -1.985008000 |
| N  | 1.621744000  | 1.328202000  | 0.000000000  |
| H  | -0.758280000 | -0.654381000 | -2.208266000 |
| H  | -0.758280000 | -0.654381000 | 2.208266000  |
| H  | 1.817278000  | -1.668689000 | 0.808533000  |
| H  | 0.652404000  | -2.448113000 | 0.000000000  |
| H  | -1.239762000 | 2.144955000  | -0.807353000 |
| H  | -2.254528000 | 1.175904000  | 0.000000000  |
| H  | -1.239762000 | 2.144955000  | 0.807353000  |
| H  | 1.645870000  | 1.948158000  | -0.808020000 |
| H  | 1.645870000  | 1.948158000  | 0.808020000  |
| H  | 2.531386000  | 0.868867000  | 0.000000000  |
| O  | -1.935562000 | -1.557895000 | -1.067262000 |
| O  | -1.935562000 | -1.557895000 | 1.067262000  |
| H  | 1.817278000  | -1.668689000 | -0.808533000 |
| H  | -0.220686000 | 0.877273000  | 2.454832000  |
| H  | 0.842204000  | -0.337914000 | -2.449913000 |
| H  | -0.220686000 | 0.877273000  | -2.454832000 |
| H  | 0.842204000  | -0.337914000 | 2.449913000  |
| N  | 1.202614000  | -1.587928000 | 0.000000000  |

Complex **8**:

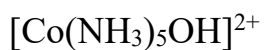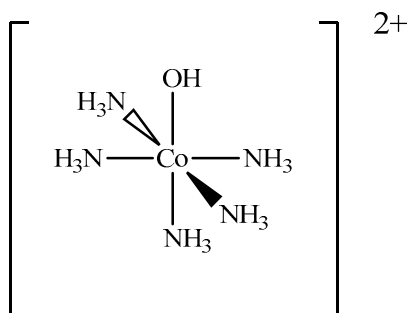

Imaginary frequencies: none

$E^0$ : -1740.4818048 a.u.

|    |              |              |              |
|----|--------------|--------------|--------------|
| Co | 0.064279000  | 0.048346000  | -0.029256000 |
| N  | -0.060243000 | -0.032841000 | 1.950854000  |
| N  | -1.262081000 | 1.523788000  | -0.004832000 |
| O  | -1.323264000 | -1.149639000 | 0.079971000  |
| N  | 0.060045000  | -0.053614000 | -2.013946000 |
| N  | 1.641150000  | 1.332262000  | -0.006683000 |
| H  | -0.267106000 | -0.982047000 | -2.280444000 |
| H  | -0.823313000 | -0.705812000 | 2.063350000  |
| H  | 1.877084000  | -1.662919000 | 0.782495000  |
| H  | 0.504345000  | -2.297075000 | 0.129649000  |
| H  | -1.480518000 | 1.970244000  | -0.893508000 |
| H  | -2.126288000 | 1.077787000  | 0.305930000  |
| H  | -1.078163000 | 2.292537000  | 0.637568000  |
| H  | 1.534489000  | 2.126302000  | -0.636190000 |
| H  | 1.814078000  | 1.744011000  | 0.908866000  |
| H  | 2.526641000  | 0.902235000  | -0.269009000 |
| H  | -1.958834000 | -1.180985000 | -0.641645000 |
| H  | 1.740476000  | -1.800226000 | -0.824677000 |
| H  | -0.339227000 | 0.812109000  | 2.445389000  |
| H  | 0.963127000  | 0.070780000  | -2.469341000 |
| H  | -0.567349000 | 0.593744000  | -2.487865000 |
| H  | 0.741277000  | -0.393394000 | 2.464419000  |
| N  | 1.214165000  | -1.568912000 | 0.015645000  |

Complex **9**:

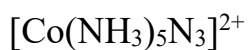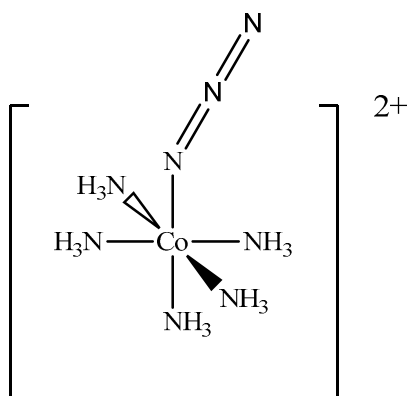

Imaginary frequencies: none

$E^0$ : -1828.7720178 a.u.

|    |              |              |              |
|----|--------------|--------------|--------------|
| Co | -0.028860000 | 0.084870000  | 0.000000000  |
| N  | -0.147807000 | 0.061125000  | 1.988647000  |
| N  | -1.005433000 | 1.823359000  | 0.000000000  |
| N  | -1.806363000 | -0.634258000 | 0.000000000  |
| N  | -0.147807000 | 0.061125000  | -1.988647000 |
| N  | 1.783622000  | 1.042138000  | 0.000000000  |
| H  | 0.258368000  | -0.751301000 | -2.449636000 |
| H  | 0.258368000  | -0.751301000 | 2.449636000  |
| H  | 1.470597000  | -1.861473000 | 0.806240000  |
| H  | 0.204102000  | -2.473768000 | 0.000000000  |
| H  | -0.868891000 | 2.426862000  | -0.808760000 |
| H  | -1.991698000 | 1.554375000  | 0.000000000  |
| H  | -0.868891000 | 2.426862000  | 0.808760000  |
| H  | 1.924634000  | 1.648403000  | -0.806403000 |
| H  | 1.924634000  | 1.648403000  | 0.806403000  |
| H  | 2.591171000  | 0.420907000  | 0.000000000  |
| H  | 1.470597000  | -1.861473000 | -0.806240000 |
| H  | -1.147958000 | 0.007099000  | 2.187625000  |
| H  | 0.214090000  | 0.865518000  | -2.498281000 |
| H  | -1.147958000 | 0.007099000  | -2.187625000 |
| H  | 0.214090000  | 0.865518000  | 2.498281000  |
| N  | 0.869581000  | -1.696233000 | 0.000000000  |
| N  | -1.959682000 | -1.841804000 | 0.000000000  |
| N  | -2.141277000 | -2.958364000 | 0.000000000  |

Complex **10**:

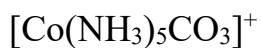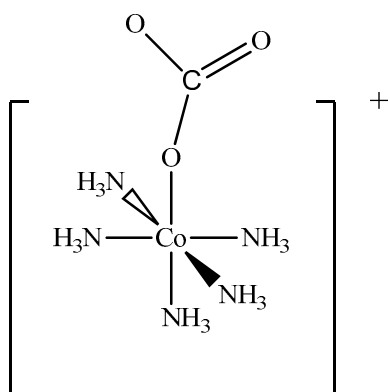

Imaginary frequencies: none

$E^0$ : -1928.6530535 a.u.

|    |              |              |              |
|----|--------------|--------------|--------------|
| Co | -1.015489000 | 1.062744000  | 0.000000000  |
| N  | -1.148847000 | 0.772405000  | 1.952946000  |
| N  | -3.020610000 | 1.177377000  | 0.000000000  |
| C  | -2.084654000 | -1.284428000 | 0.000000000  |
| N  | -1.148847000 | 0.772405000  | -1.952946000 |
| N  | -0.988231000 | 3.096478000  | 0.000000000  |
| H  | -0.277010000 | 0.489770000  | -2.389757000 |
| H  | -0.277010000 | 0.489770000  | 2.389757000  |
| H  | 1.440072000  | 1.303539000  | 0.816294000  |
| H  | 1.048249000  | -0.076807000 | 0.000000000  |
| H  | -3.408102000 | 1.645196000  | -0.814740000 |
| H  | -3.422171000 | 0.229562000  | 0.000000000  |
| H  | -3.408102000 | 1.645196000  | 0.814740000  |
| H  | -1.444154000 | 3.504554000  | -0.811971000 |
| H  | -1.444154000 | 3.504554000  | 0.811971000  |
| H  | -0.044191000 | 3.472982000  | 0.000000000  |
| O  | -2.614894000 | -1.391326000 | -1.125070000 |
| O  | -2.614894000 | -1.391326000 | 1.125070000  |
| H  | 1.440072000  | 1.303539000  | -0.816294000 |
| H  | -1.739973000 | -0.109921000 | 1.909104000  |
| H  | -1.582408000 | 1.448928000  | -2.574953000 |
| H  | -1.739973000 | -0.109921000 | -1.909104000 |
| H  | -1.582408000 | 1.448928000  | 2.574953000  |
| N  | 0.954623000  | 0.942461000  | 0.000000000  |
| O  | -0.802163000 | -0.775272000 | 0.000000000  |

Complex **11**:

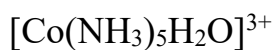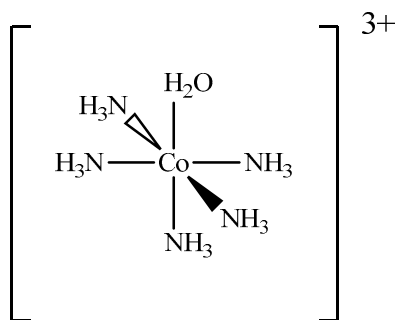

Imaginary frequencies: none

$E^0$ : -1740.5644836 a.u.

|    |              |              |              |
|----|--------------|--------------|--------------|
| Co | 0.022006000  | 0.029319000  | 0.000000000  |
| N  | -0.012523000 | -0.031046000 | 1.998911000  |
| N  | -1.167931000 | 1.630333000  | 0.000000000  |
| O  | -1.603162000 | -1.151635000 | 0.000000000  |
| N  | -0.012523000 | -0.031046000 | -1.998911000 |
| N  | 1.587523000  | 1.211854000  | 0.000000000  |
| H  | -0.106564000 | -0.982702000 | -2.362368000 |
| H  | -0.106564000 | -0.982702000 | 2.362368000  |
| H  | 1.793974000  | -1.698327000 | 0.808207000  |
| H  | 0.599921000  | -2.443543000 | 0.000000000  |
| H  | -1.068893000 | 2.251174000  | -0.806073000 |
| H  | -2.151063000 | 1.348354000  | 0.000000000  |
| H  | -1.068893000 | 2.251174000  | 0.806073000  |
| H  | 1.628948000  | 1.838272000  | -0.807146000 |
| H  | 1.628948000  | 1.838272000  | 0.807146000  |
| H  | 2.485427000  | 0.722323000  | 0.000000000  |
| H  | -2.094753000 | -1.466716000 | -0.773258000 |
| H  | -2.094753000 | -1.466716000 | 0.773258000  |
| H  | 1.793974000  | -1.698327000 | -0.808207000 |
| H  | -0.787083000 | 0.483682000  | 2.424397000  |
| H  | 0.822611000  | 0.331210000  | -2.464741000 |
| H  | -0.787083000 | 0.483682000  | -2.424397000 |
| H  | 0.822611000  | 0.331210000  | 2.464741000  |
| N  | 1.175862000  | -1.598135000 | 0.000000000  |

Complex **12**:

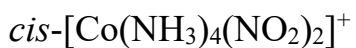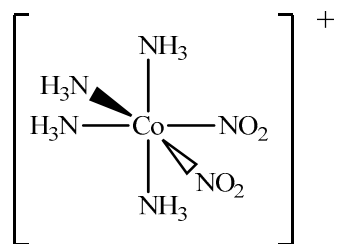

Imaginary frequencies: none

$E^0$ : -2018.5149459 a.u.

|    |              |              |              |
|----|--------------|--------------|--------------|
| Co | 0.075118000  | 0.008575000  | 0.000000000  |
| N  | 0.024230000  | 0.011628000  | 1.965435000  |
| N  | -1.032702000 | 1.606567000  | 0.000000000  |
| N  | -1.486150000 | -1.151954000 | 0.000000000  |
| N  | 0.024230000  | 0.011628000  | -1.965435000 |
| N  | 1.649744000  | 1.295603000  | 0.000000000  |
| H  | -0.641239000 | -0.725288000 | -2.218160000 |
| H  | -0.641239000 | -0.725288000 | 2.218160000  |
| H  | 1.806894000  | -1.792079000 | 0.812743000  |
| H  | 0.599764000  | -2.506358000 | 0.000000000  |
| O  | -1.331840000 | 2.111131000  | -1.064323000 |
| O  | -1.331840000 | 2.111131000  | 1.064323000  |
| H  | 1.609565000  | 1.912408000  | -0.808467000 |
| H  | 1.609565000  | 1.912408000  | 0.808467000  |
| H  | 2.578902000  | 0.883647000  | 0.000000000  |
| O  | -1.932399000 | -1.532920000 | -1.064139000 |
| O  | -1.932399000 | -1.532920000 | 1.064139000  |
| H  | 1.806894000  | -1.792079000 | -0.812743000 |
| H  | -0.427434000 | 0.898549000  | 2.211914000  |
| H  | 0.874275000  | -0.095478000 | -2.509336000 |
| H  | -0.427434000 | 0.898549000  | -2.211914000 |
| H  | 0.874275000  | -0.095478000 | 2.509336000  |
| N  | 1.205570000  | -1.687601000 | 0.000000000  |

# Complex **13**:

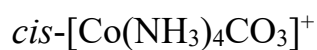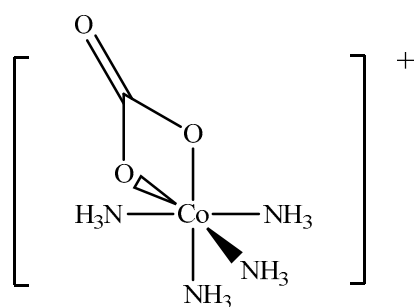

Imaginary frequencies: none

$E^0$ : -1872.1601993 a.u.

|    |              |              |              |
|----|--------------|--------------|--------------|
| Co | 0.000000000  | 0.000000000  | 0.420919000  |
| N  | -1.970179000 | 0.000352000  | 0.286030000  |
| N  | 0.000609000  | 1.553293000  | 1.716830000  |
| C  | 0.000000000  | 0.000000000  | -1.887349000 |
| N  | 1.970179000  | -0.000352000 | 0.286030000  |
| N  | -0.000609000 | -1.553293000 | 1.716830000  |
| H  | 2.209143000  | 0.812572000  | -0.279575000 |
| H  | -2.209011000 | 0.814056000  | -0.278508000 |
| H  | 0.807219000  | 1.643129000  | 2.328049000  |
| H  | 0.008068000  | 2.369952000  | 1.107028000  |
| H  | -0.812935000 | 1.650909000  | 2.317583000  |
| H  | 0.812935000  | -1.650909000 | 2.317583000  |
| H  | -0.807219000 | -1.643129000 | 2.328049000  |
| H  | -0.008068000 | -2.369952000 | 1.107028000  |
| O  | -0.000302000 | -1.072229000 | -1.076774000 |
| O  | 0.000302000  | 1.072229000  | -1.076774000 |
| H  | -2.569570000 | -0.000197000 | 1.105853000  |
| H  | 2.209011000  | -0.814056000 | -0.278508000 |
| H  | 2.569570000  | 0.000197000  | 1.105853000  |
| H  | -2.209143000 | -0.812572000 | -0.279575000 |
| O  | 0.000000000  | 0.000000000  | -3.077294000 |

Complex **14**:

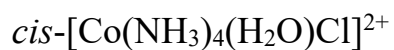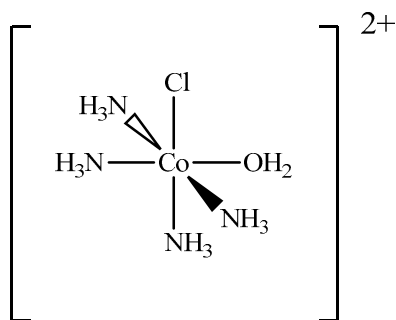

Imaginary frequencies: none

$E^0$ : -2144.6381151 a.u.

|    |              |              |              |
|----|--------------|--------------|--------------|
| Co | 0.067261000  | -0.078576000 | 0.000000000  |
| N  | 0.010785000  | -0.064503000 | 1.983634000  |
| Cl | -1.313751000 | 1.617516000  | 0.000000000  |
| O  | -1.485795000 | -1.335136000 | 0.000000000  |
| N  | 0.010785000  | -0.064503000 | -1.983634000 |
| N  | 1.523488000  | 1.220600000  | 0.000000000  |
| H  | -0.305384000 | -0.932151000 | -2.416430000 |
| H  | -0.305384000 | -0.932151000 | 2.416430000  |
| H  | 1.885626000  | -1.788157000 | 0.809434000  |
| H  | 0.691521000  | -2.534978000 | 0.000000000  |
| H  | 1.437767000  | 1.846372000  | -0.800365000 |
| H  | 1.437767000  | 1.846372000  | 0.800365000  |
| H  | 2.477321000  | 0.860825000  | 0.000000000  |
| H  | -2.081511000 | -1.238162000 | -0.757516000 |
| H  | -2.081511000 | -1.238162000 | 0.757516000  |
| H  | 1.885626000  | -1.788157000 | -0.809434000 |
| H  | -0.655453000 | 0.662881000  | 2.252682000  |
| H  | 0.885813000  | 0.161640000  | -2.454460000 |
| H  | -0.655453000 | 0.662881000  | -2.252682000 |
| H  | 0.885813000  | 0.161640000  | 2.454460000  |
| N  | 1.273496000  | -1.696742000 | 0.000000000  |



Complex **15**:

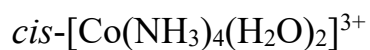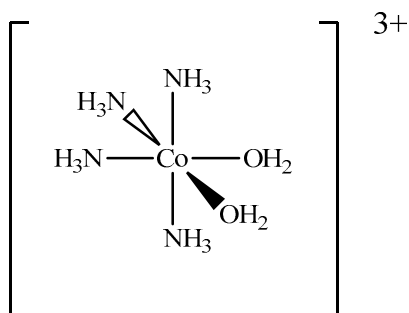

Imaginary frequencies: none

$E^0$ : -1995.222318 a.u.

|    |              |              |              |
|----|--------------|--------------|--------------|
| Co | 0.076088000  | 0.011288000  | 0.000000000  |
| N  | 0.051166000  | -0.034197000 | 1.995455000  |
| O  | -1.046697000 | 1.659797000  | 0.000000000  |
| O  | -1.543015000 | -1.151847000 | 0.000000000  |
| N  | 0.051166000  | -0.034197000 | -1.995455000 |
| N  | 1.634483000  | 1.192393000  | 0.000000000  |
| H  | -0.171368000 | -0.960992000 | -2.368901000 |
| H  | -0.171368000 | -0.960992000 | 2.368901000  |
| H  | 1.783277000  | -1.717155000 | 0.810808000  |
| H  | 0.560391000  | -2.429628000 | 0.000000000  |
| H  | -1.451647000 | 2.085633000  | -0.770226000 |
| H  | -1.451647000 | 2.085633000  | 0.770226000  |
| H  | 1.636435000  | 1.822704000  | -0.805402000 |
| H  | 1.636435000  | 1.822704000  | 0.805402000  |
| H  | 2.552040000  | 0.740572000  | 0.000000000  |
| H  | -2.119614000 | -1.279651000 | -0.769350000 |
| H  | -2.119614000 | -1.279651000 | 0.769350000  |
| H  | 1.783277000  | -1.717155000 | -0.810808000 |
| H  | -0.638750000 | 0.586471000  | 2.426117000  |
| H  | 0.934520000  | 0.214889000  | -2.447306000 |
| H  | -0.638750000 | 0.586471000  | -2.426117000 |
| H  | 0.934520000  | 0.214889000  | 2.447306000  |
| N  | 1.169829000  | -1.606464000 | 0.000000000  |

Complex **16**:

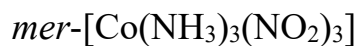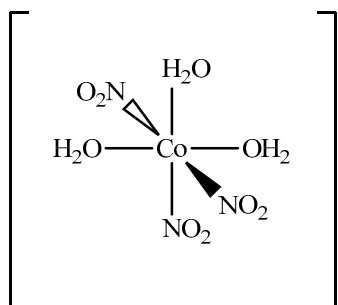

Imaginary frequencies: none

$E^0$ : -2167.2171075 a.u.

|    |              |              |              |
|----|--------------|--------------|--------------|
| Co | -0.020286000 | 0.041338000  | 0.000000000  |
| N  | -0.049532000 | 0.080705000  | 1.946196000  |
| N  | -1.184333000 | 1.609178000  | 0.000000000  |
| N  | -1.540853000 | -1.200716000 | 0.000000000  |
| N  | -0.049532000 | 0.080705000  | -1.946196000 |
| N  | 1.626147000  | 1.117264000  | 0.000000000  |
| H  | -0.473646000 | -0.755040000 | -2.337206000 |
| H  | -0.473646000 | -0.755040000 | 2.337206000  |
| H  | 1.802092000  | -1.559541000 | 0.813641000  |
| H  | 0.680927000  | -2.435781000 | 0.000000000  |
| O  | -1.541841000 | 2.090188000  | -1.061236000 |
| O  | -1.541841000 | 2.090188000  | 1.061236000  |
| O  | 2.161194000  | 1.390489000  | -1.063640000 |
| O  | 2.161194000  | 1.390489000  | 1.063640000  |
| O  | -1.964095000 | -1.625901000 | -1.063965000 |
| O  | -1.964095000 | -1.625901000 | 1.063965000  |
| H  | 1.802092000  | -1.559541000 | -0.813641000 |
| H  | -0.668038000 | 0.875489000  | 2.141885000  |
| H  | 0.867382000  | 0.295232000  | -2.328151000 |
| H  | -0.668038000 | 0.875489000  | -2.141885000 |
| H  | 0.867382000  | 0.295232000  | 2.328151000  |
| N  | 1.194536000  | -1.559353000 | 0.000000000  |

Complex **17**:

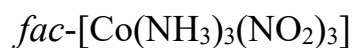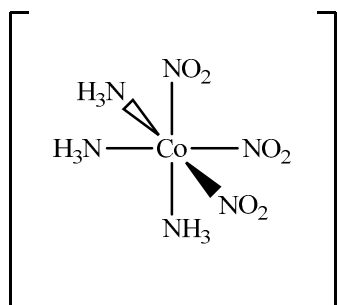

Imaginary frequencies: none

$E^0$ : -2167.1986573 a.u.

|    |              |              |              |
|----|--------------|--------------|--------------|
| Co | 0.015886000  | 0.035364000  | -0.018310000 |
| N  | 0.145932000  | 0.066918000  | 1.906324000  |
| N  | -1.102134000 | 1.607844000  | -0.093333000 |
| N  | -1.519365000 | -1.135637000 | -0.020459000 |
| N  | -0.027052000 | -0.012052000 | -2.016329000 |
| N  | 1.552936000  | 1.330558000  | -0.031383000 |
| H  | -0.658737000 | -0.773718000 | -2.264611000 |
| O  | 0.077414000  | -0.985438000 | 2.518114000  |
| H  | 0.980615000  | -1.971473000 | 1.014492000  |
| H  | 0.621211000  | -2.326486000 | -0.551426000 |
| O  | -0.849282000 | 2.395932000  | -1.019509000 |
| O  | -1.963887000 | 1.818134000  | 0.708777000  |
| H  | 1.292689000  | 2.079668000  | -0.670133000 |
| H  | 1.540007000  | 1.716836000  | 0.915792000  |
| H  | 2.492945000  | 1.017994000  | -0.244554000 |
| O  | -1.517264000 | -2.012879000 | -0.899864000 |
| O  | -2.400479000 | -1.035647000 | 0.781821000  |
| H  | 2.087449000  | -1.649803000 | -0.174850000 |
| O  | 0.399323000  | 1.121816000  | 2.461992000  |
| H  | 0.855701000  | -0.156159000 | -2.492353000 |
| H  | -0.410820000 | 0.886959000  | -2.308544000 |
| N  | 1.099103000  | -1.656568000 | 0.048433000  |

Complex **18**:

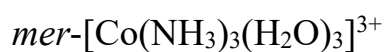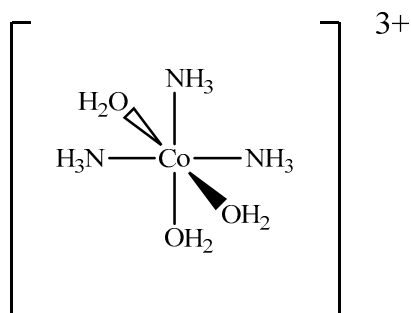

Imaginary frequencies: none

$E^0$ : -1780.2290381 a.u.

|    |              |              |              |
|----|--------------|--------------|--------------|
| Co | 0.017241000  | 0.011583000  | 0.000000000  |
| N  | -0.004953000 | -0.026554000 | 1.992105000  |
| O  | -1.164128000 | 1.609625000  | 0.000000000  |
| O  | -1.533073000 | -1.164161000 | 0.000000000  |
| N  | -0.004953000 | -0.026554000 | -1.992105000 |
| O  | 1.613643000  | 1.120513000  | 0.000000000  |
| H  | -0.144546000 | -0.968193000 | -2.370015000 |
| H  | -0.144546000 | -0.968193000 | 2.370015000  |
| H  | 1.799357000  | -1.594192000 | 0.807887000  |
| H  | 0.637468000  | -2.425648000 | 0.000000000  |
| H  | -1.403419000 | 2.146504000  | -0.770611000 |
| H  | -1.403419000 | 2.146504000  | 0.770611000  |
| H  | 1.905019000  | 1.632719000  | -0.771205000 |
| H  | 1.905019000  | 1.632719000  | 0.771205000  |
| H  | -2.118022000 | -1.246523000 | -0.771004000 |
| H  | -2.118022000 | -1.246523000 | 0.771004000  |
| H  | 1.799357000  | -1.594192000 | -0.807887000 |
| H  | -0.748513000 | 0.534918000  | 2.415992000  |
| H  | 0.854235000  | 0.299753000  | -2.442820000 |
| H  | -0.748513000 | 0.534918000  | -2.415992000 |
| H  | 0.854235000  | 0.299753000  | 2.442820000  |
| N  | 1.173397000  | -1.553155000 | 0.000000000  |

Complex **19**:

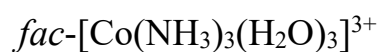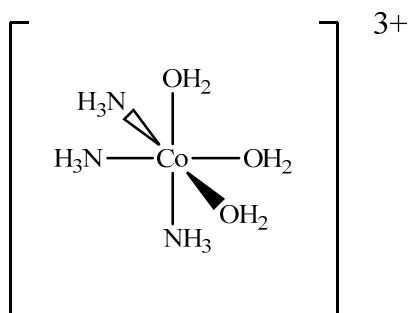

Imaginary frequencies: none

$E^0$ : -1780.2421265 a.u.

|    |              |              |              |
|----|--------------|--------------|--------------|
| Co | 0.059207000  | 0.028792000  | -0.063258000 |
| O  | 0.013992000  | 0.033143000  | 1.916278000  |
| O  | -1.097437000 | 1.633260000  | 0.029982000  |
| O  | -1.612067000 | -1.029348000 | 0.023152000  |
| N  | -0.025123000 | 0.049542000  | -2.007342000 |
| N  | 1.652612000  | 1.145980000  | -0.054219000 |
| H  | 0.706611000  | -0.479521000 | -2.488486000 |
| H  | -0.675235000 | -0.441807000 | 2.406830000  |
| H  | 1.197740000  | -1.967741000 | 0.892560000  |
| H  | 0.722611000  | -2.360803000 | -0.620503000 |
| H  | -1.476262000 | 2.189454000  | -0.668372000 |
| H  | -1.350314000 | 2.024347000  | 0.881072000  |
| H  | 2.194167000  | 1.152316000  | -0.922275000 |
| H  | 1.393300000  | 2.122535000  | 0.112752000  |
| H  | 2.326469000  | 0.906338000  | 0.678183000  |
| H  | -1.762570000 | -1.987386000 | 0.015263000  |
| H  | -2.481513000 | -0.599385000 | 0.044010000  |
| H  | 2.084082000  | -1.504070000 | -0.393237000 |
| H  | 0.618696000  | 0.420506000  | 2.568081000  |
| H  | 0.011465000  | 0.987106000  | -2.416696000 |
| H  | -0.909600000 | -0.359128000 | -2.322749000 |
| N  | 1.121362000  | -1.601964000 | -0.060937000 |

Complex **20**:

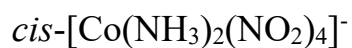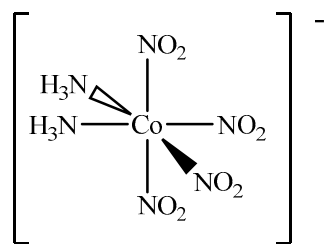

Imaginary frequencies: none

$E^0$ : -2315.7674034 a.u.

|    |              |              |              |
|----|--------------|--------------|--------------|
| Co | 0.013169000  | 0.095560000  | 0.032053000  |
| N  | 0.264777000  | 0.056632000  | 1.976300000  |
| N  | -1.244123000 | 1.600096000  | 0.011904000  |
| N  | -1.479288000 | -1.174894000 | 0.094134000  |
| N  | -0.099565000 | 0.096105000  | -1.932930000 |
| N  | 1.576541000  | 1.262414000  | -0.165570000 |
| H  | -0.631731000 | -0.720223000 | -2.221873000 |
| H  | 1.284149000  | -1.751392000 | 0.924221000  |
| H  | 0.766831000  | -2.208931000 | -0.603845000 |
| O  | -1.336685000 | 2.251764000  | -1.041452000 |
| O  | -1.938107000 | 1.853808000  | 0.958785000  |
| O  | 2.487447000  | 0.838162000  | -0.899667000 |
| O  | 1.656450000  | 2.345696000  | 0.356038000  |
| O  | -1.525733000 | -2.010645000 | -0.826940000 |
| O  | -2.294671000 | -1.186166000 | 0.981148000  |
| H  | 2.089597000  | -1.175721000 | -0.452954000 |
| O  | 0.109641000  | 1.037907000  | 2.651264000  |
| H  | 0.829968000  | 0.110584000  | -2.337679000 |
| H  | -0.593213000 | 0.973162000  | -2.132530000 |
| O  | 0.645400000  | -1.012543000 | 2.480739000  |
| N  | 1.200435000  | -1.471609000 | -0.059411000 |

Complex **21**:

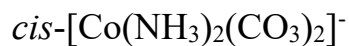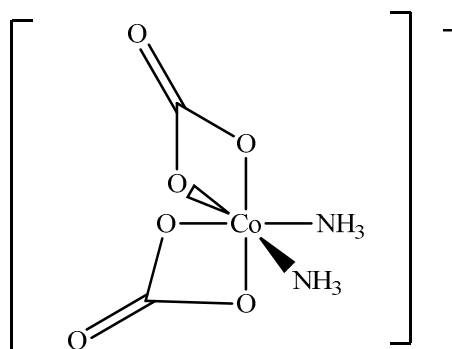

Imaginary frequencies: none

$E^0$ : -2023.0443409 a.u.

|    |              |              |              |
|----|--------------|--------------|--------------|
| Co | -1.509417000 | 1.720395000  | 0.267683000  |
| N  | -1.143975000 | 1.549230000  | 2.220895000  |
| C  | -0.120716000 | -0.112193000 | -0.029825000 |
| N  | -1.140658000 | 3.673830000  | 0.106208000  |
| H  | -1.271512000 | 0.541054000  | 2.289226000  |
| H  | -1.387798000 | 3.771977000  | -0.876971000 |
| H  | -1.742580000 | 4.274689000  | 0.655474000  |
| H  | -0.167006000 | 3.919469000  | 0.235090000  |
| O  | 0.252298000  | 1.155596000  | -0.106177000 |
| O  | -1.414821000 | -0.158225000 | 0.252026000  |
| H  | -1.824443000 | 2.015526000  | 2.807820000  |
| H  | -0.200125000 | 1.778785000  | 2.506351000  |
| O  | 0.610908000  | -1.077014000 | -0.158073000 |
| O  | -3.352322000 | 2.088099000  | 0.443404000  |
| O  | -2.305139000 | 1.897209000  | -1.427611000 |
| C  | -3.487449000 | 2.122527000  | -0.872964000 |
| O  | -4.518507000 | 2.360522000  | -1.475356000 |

Complex **22**:

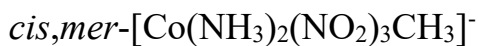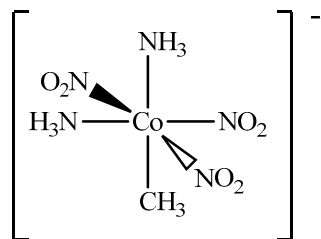

Imaginary frequencies: none

$E^0$ : -2150.6025633 a.u.

|    |              |              |              |
|----|--------------|--------------|--------------|
| Co | -1.111205000 | 0.753679000  | 0.000000000  |
| N  | -1.282655000 | 0.830571000  | 1.969458000  |
| N  | -3.090832000 | 1.056437000  | 0.000000000  |
| C  | -1.401837000 | -1.178629000 | 0.000000000  |
| N  | -1.282655000 | 0.830571000  | -1.969458000 |
| N  | -0.773531000 | 2.780844000  | 0.000000000  |
| O  | -0.959839000 | -0.036778000 | -2.742945000 |
| O  | -0.959839000 | -0.036778000 | 2.742945000  |
| O  | 1.399593000  | 0.559486000  | 1.063957000  |
| H  | -3.312463000 | 1.583394000  | -0.840991000 |
| H  | -3.601202000 | 0.181816000  | 0.000000000  |
| H  | -3.312463000 | 1.583394000  | 0.840991000  |
| H  | -1.208214000 | 3.134994000  | -0.847644000 |
| H  | -1.208214000 | 3.134994000  | 0.847644000  |
| H  | 0.210926000  | 3.017175000  | 0.000000000  |
| H  | -1.952210000 | -1.467108000 | -0.900460000 |
| H  | -1.952210000 | -1.467108000 | 0.900460000  |
| O  | 1.399593000  | 0.559486000  | -1.063957000 |
| O  | -1.867164000 | 1.852975000  | -2.399708000 |
| O  | -1.867164000 | 1.852975000  | 2.399708000  |
| N  | 0.795922000  | 0.558623000  | 0.000000000  |
| H  | -0.446115000 | -1.705740000 | 0.000000000  |



Complex **23**:

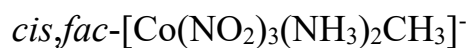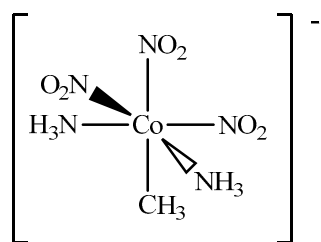

Imaginary frequencies: none

$E^0$ : -2150.6041769 a.u.

|    |              |              |              |
|----|--------------|--------------|--------------|
| Co | -1.187328000 | 0.693569000  | -0.067428000 |
| N  | -1.162575000 | 0.606210000  | 1.875590000  |
| N  | -3.217621000 | 0.898548000  | -0.099084000 |
| N  | -1.498002000 | -1.255034000 | -0.058687000 |
| N  | -1.338576000 | 0.687740000  | -2.043891000 |
| N  | -0.820401000 | 2.609044000  | -0.203850000 |
| H  | -0.573356000 | 0.266795000  | -2.553727000 |
| O  | -0.974314000 | -0.505979000 | 2.411190000  |
| H  | 1.245438000  | 1.093713000  | 0.589677000  |
| H  | 1.001641000  | -0.623026000 | 0.212086000  |
| O  | -3.832052000 | 1.752871000  | 0.495754000  |
| O  | -3.839424000 | 0.074656000  | -0.811578000 |
| O  | -1.217173000 | 3.190631000  | -1.232201000 |
| O  | -0.180066000 | 3.218012000  | 0.618326000  |
| H  | -0.867507000 | -1.788261000 | -0.641703000 |
| H  | -2.466393000 | -1.407534000 | -0.335253000 |
| H  | 1.173543000  | 0.571295000  | -1.102277000 |
| O  | -1.364916000 | 1.576334000  | 2.559602000  |
| H  | -1.382222000 | 1.701716000  | -2.220260000 |
| H  | -2.226454000 | 0.253936000  | -2.283499000 |
| C  | 0.759846000  | 0.399991000  | -0.099196000 |
| H  | -1.333703000 | -1.469690000 | 0.934102000  |

Complex **24**:

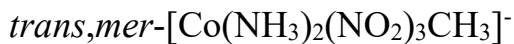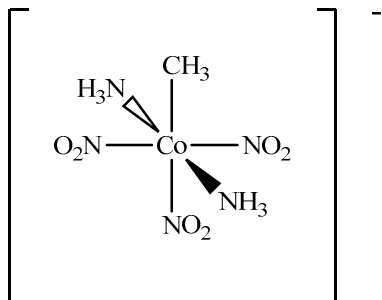

Imaginary frequencies: none

$E^0$ : -2150.6363178 a.u.

|    |              |              |              |
|----|--------------|--------------|--------------|
| Co | -0.001198000 | 0.014630000  | 0.000000000  |
| N  | -0.040610000 | 0.066517000  | 1.936042000  |
| N  | -1.217908000 | 1.660873000  | 0.000000000  |
| N  | -1.527303000 | -1.207721000 | 0.000000000  |
| N  | -0.040610000 | 0.066517000  | -1.936042000 |
| N  | 1.628960000  | 1.096288000  | 0.000000000  |
| H  | -0.459392000 | -0.784873000 | -2.292840000 |
| H  | -0.459392000 | -0.784873000 | 2.292840000  |
| H  | 1.838767000  | -1.538460000 | 0.883976000  |
| H  | 0.626103000  | -2.492564000 | 0.000000000  |
| O  | -1.588229000 | 2.161166000  | -1.060401000 |
| O  | -1.588229000 | 2.161166000  | 1.060401000  |
| O  | 2.158331000  | 1.417428000  | -1.060871000 |
| O  | 2.158331000  | 1.417428000  | 1.060871000  |
| O  | -1.992929000 | -1.615614000 | -1.060697000 |
| O  | -1.992929000 | -1.615614000 | 1.060697000  |
| H  | 1.838767000  | -1.538460000 | -0.883976000 |
| H  | -0.648848000 | 0.863705000  | 2.142796000  |
| H  | 0.893695000  | 0.250851000  | -2.284778000 |
| H  | -0.648848000 | 0.863705000  | -2.142796000 |
| H  | 0.893695000  | 0.250851000  | 2.284778000  |
| C  | 1.192821000  | -1.557616000 | 0.000000000  |

Complex **25**:

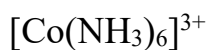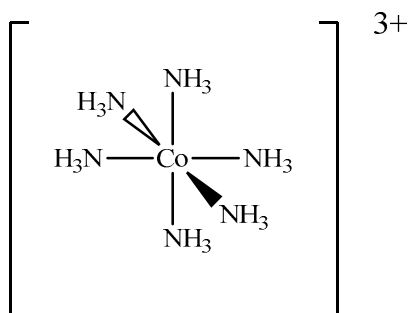

Imaginary frequencies: none

$E^0$ : -1720.7248341 a.u.

|    |              |              |              |
|----|--------------|--------------|--------------|
| Co | -1.242128000 | 0.756437000  | 0.000000000  |
| N  | -1.211505000 | 0.715995000  | 2.004476000  |
| N  | -3.220107000 | 1.088384000  | 0.000000000  |
| N  | -1.581582000 | -1.221094000 | 0.000000000  |
| N  | -1.211505000 | 0.715995000  | -2.004476000 |
| N  | -0.980601000 | 2.744367000  | 0.000000000  |
| H  | -0.647906000 | -0.050250000 | -2.379566000 |
| H  | -0.647906000 | -0.050250000 | 2.379566000  |
| H  | 1.216882000  | 0.917434000  | 0.807690000  |
| H  | 1.068691000  | -0.469256000 | 0.000000000  |
| H  | -3.551561000 | 1.623842000  | -0.805203000 |
| H  | -3.799650000 | 0.246344000  | 0.000000000  |
| H  | -3.551561000 | 1.623842000  | 0.805203000  |
| H  | -1.396347000 | 3.217345000  | -0.805185000 |
| H  | -1.396347000 | 3.217345000  | 0.805185000  |
| H  | -0.006155000 | 3.053286000  | 0.000000000  |
| H  | -2.116858000 | -1.547428000 | -0.807607000 |
| H  | -2.116858000 | -1.547428000 | 0.807607000  |
| H  | 1.216882000  | 0.917434000  | -0.807690000 |
| H  | -2.125140000 | 0.595966000  | 2.447084000  |
| H  | -0.823972000 | 1.552610000  | -2.445919000 |
| H  | -2.125140000 | 0.595966000  | -2.447084000 |
| H  | -0.823972000 | 1.552610000  | 2.445919000  |
| N  | 0.748243000  | 0.501194000  | 0.000000000  |
| H  | -0.747394000 | -1.811355000 | 0.000000000  |

Complex **26**:

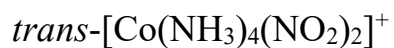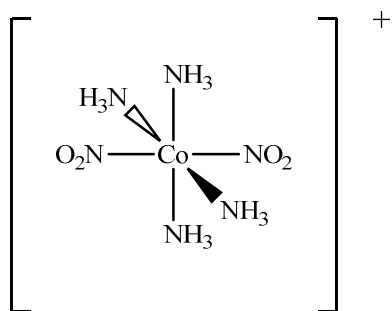

Imaginary frequencies: none

$E^0$ : -2018.5139612 a.u.

|    |              |              |              |
|----|--------------|--------------|--------------|
| Co | -0.037849000 | 0.030218000  | 0.000000000  |
| N  | -0.074982000 | -0.003727000 | 1.965397000  |
| N  | -1.308345000 | 1.548898000  | 0.000000000  |
| N  | -1.548859000 | -1.267310000 | 0.000000000  |
| N  | -0.074982000 | -0.003727000 | -1.965397000 |
| N  | 1.435787000  | 1.286939000  | 0.000000000  |
| H  | -0.812851000 | -0.667288000 | -2.225308000 |
| H  | -0.812851000 | -0.667288000 | 2.225308000  |
| H  | 1.882378000  | -1.444071000 | 0.806684000  |
| H  | 0.809432000  | -2.374699000 | 0.000000000  |
| H  | -1.191340000 | 2.157872000  | -0.806372000 |
| H  | -2.280085000 | 1.245002000  | 0.000000000  |
| H  | -1.191340000 | 2.157872000  | 0.806372000  |
| O  | 1.876341000  | 1.661872000  | -1.069907000 |
| O  | 1.876341000  | 1.661872000  | 1.069907000  |
| O  | -2.000426000 | -1.657945000 | -1.064791000 |
| O  | -2.000426000 | -1.657945000 | 1.064791000  |
| H  | 1.882378000  | -1.444071000 | -0.806684000 |
| H  | -0.267645000 | 0.898557000  | 2.389272000  |
| H  | 0.806294000  | -0.282650000 | -2.385568000 |
| H  | -0.267645000 | 0.898557000  | -2.389272000 |
| H  | 0.806294000  | -0.282650000 | 2.385568000  |
| N  | 1.262974000  | -1.463138000 | 0.000000000  |

Complex **27**:

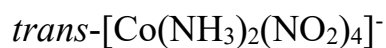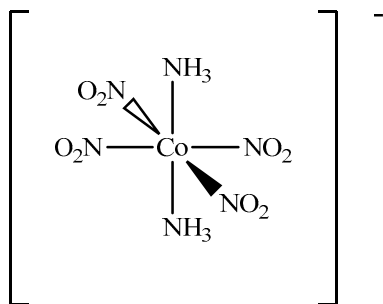

Imaginary frequencies: none

$E^0$ : -2315.7950751 a.u.

|    |              |              |              |
|----|--------------|--------------|--------------|
| Co | -1.304667000 | 0.841291000  | 0.000000000  |
| N  | -1.322889000 | 0.865513000  | 1.935272000  |
| N  | -3.274129000 | 1.110182000  | 0.000000000  |
| N  | -1.577018000 | -1.095081000 | 0.000000000  |
| N  | -1.322889000 | 0.865513000  | -1.935272000 |
| N  | -0.984831000 | 2.802828000  | 0.000000000  |
| H  | -0.763541000 | 0.104076000  | -2.296459000 |
| H  | -0.763541000 | 0.104076000  | 2.296459000  |
| O  | 1.218596000  | 0.437584000  | 1.064381000  |
| O  | -3.879802000 | 1.187210000  | -1.060759000 |
| O  | -3.879802000 | 1.187210000  | 1.060759000  |
| O  | -0.880979000 | 3.404403000  | -1.060788000 |
| O  | -0.880979000 | 3.404403000  | 1.060788000  |
| O  | -1.656976000 | -1.690013000 | -1.064354000 |
| O  | -1.656976000 | -1.690013000 | 1.064354000  |
| O  | 1.218596000  | 0.437584000  | -1.064381000 |
| H  | -2.297294000 | 0.783342000  | 2.216900000  |
| H  | -0.954279000 | 1.770839000  | -2.217879000 |
| H  | -2.297294000 | 0.783342000  | -2.216900000 |
| H  | -0.954279000 | 1.770839000  | 2.217879000  |
| N  | 0.626389000  | 0.535130000  | 0.000000000  |
